# Supplementary material for: Chromosome 11q loss and MYCN amplification demonstrate synthetic lethality with checkpoint kinase 1 inhibition in neuroblastoma
Source: Front Oncol. 2022 Sep 27;12:929123. doi: 10.3389/fonc.2022.929123 (PMC9552537; doi:10.3389/fonc.2022.929123)
Supplement: Supplementary file 1 [file DataSheet_1.xlsx]

## Sheet: Table_1
Supplementary Table 1| PCR primers used to confirm chromosome 11q status in SKNSH clones
Primer A	GGAAAGATGCCACACAGTCCT
Primer B	GCCTCAGAGCAGGAACAGTACA
Primer C	GGAGATAATGCTTGGGCTGTC

## Sheet: Table_2
Supplementary Table 2| Compounds and associated targets included in drug library
Drug	Synonyms	Category	Target
3-AP	Triapine; 3-aminopyridine-2-carboxaldehyde thiosemicarbazone	Targeted	RRM2
4-Hydroperoxy cyclophosphamide	NA	Cytotoxic	DNA
6-Mercaptopurine	Mercaptopurine; 6-MP; Purinethol	Cytotoxic	HPRT1
6-Thioguanine	6-TG; 2-amino-6-mercaptopurine; 2-amino-6-purinethiol; Thiosix; Lanvis; Tioguanine; Thioguanine	Cytotoxic	HPRT1
Abemaciclib	LY2835219	Targeted	CDK4; CDK6
Aclarubicin	NA	Cytotoxic	TOP1; TOP2
Actinomycin D	Dactinomycin	Cytotoxic	RNA polymerase
Adavosertib	MK-1775; Adavosertib	Targeted	WEE1
Afatinib	BIBW2992; Tovok; Gilotrif	Targeted	EGFR; ERBB2 (HER2, CD340); ERBB4 (HER4)
Alectinib	Alecensa; RG7853; AF802; CH5424802; CH 5424802; RO5424802	Targeted	ALK (CD246); EML4-ALK
Alisertib	MLN8237	Targeted	AURKA
AMG 337	AMG-337	Targeted	MET
AMG-176	NA	Targeted	MCL1
Apatinib	YN968D1; YN 968D1; YN-968D1	Targeted	VEGFR2 (KDR)
AT-406	AT406; SM-406; ARRY-334543	Targeted	cIAP1; cIAP2; XIAP
AT7519	AT-7519	Targeted	CDK1; CDK2
Axitinib	AG 013736	Targeted	VEGFR1 (FLT1); VEGFR2 (KDR); VEGFR3 (FLT4)
AZD4547	NA	Targeted	FGFR1; FGFR2; FGFR3; FGFR4
AZD5582	NA	Targeted	cIAP1; cIAP2; XIAP
AZD5991	AZD-5991	Targeted	MCL1
AZD8055	AZD-8055	Targeted	MTOR
Belinostat	PXD101; PX105684; Beleodaq	Targeted	HDAC1; HDAC2; HDAC3; HDAC4; HDAC5; HDAC6; HDAC7; HDAC8; HDAC9; HDAC10; HDAC11
Berzosertib	VE822; VE 822; VX970; VX-970; VX 970	Targeted	ATR
BI 894999	NA	Targeted	BRD4
Binimetinib	MEK162; ARRY-162; ARRY-438162	Targeted	MAP2K (MEK)
Birabresib	OTX 015; OTX015; MK-8628; MK 8628; MK8628; Birabresib	Targeted	BRD2; BRD3; BRD4
Birinapant	TL32711	Targeted	cIAP1; XIAP
Bortezomib	PS-341; PS341; PS 341; LDP-341; MLM341; Velcade	Targeted	PSMB5
Bosutinib	SKI-606; Bosulif	Targeted	ABL1 | SRC
Brigatinib	AP-26113; Alunbrig; Briganix	Targeted	EML4-ALK
Buparlisib	BKM120; NVP-BKM120	Targeted	PI3Kα; PI3Kβ; PI3Kδ
Busulfan	Myleran; Busulphan; Sulphabutin; Myelosan; Leucosulfan; Busulfex	Cytotoxic	DNA
Cabozantinib	XL184; XL-184; BMS-907351; Cometriq	Targeted	AXL | MET | VEGFR2 (KDR)
Camptothecin	(S)-(+)-Camptothecin; CPT; 7-Ethyl-10-Hydroxy-Camptothecin; SN-38, Irinotecan; Camptothecin-11; Camptosar	Cytotoxic	TOP1
Capmatinib	INCB28060; INC280; NVP-INC280	Targeted	MET
Carboplatin	NSC 241240	Cytotoxic	DNA
Carfilzomib	PR-171	Targeted	PSMB5
Cediranib	AZD2171; NSC-732208; Recentin	Targeted	VEGFR1 (FLT1); VEGFR2 (KDR); VEGFR3 (FLT4)
Ceralasertib	Ceralasertib	Targeted	ATR
Ceritinib	LDK378	Targeted	EML4-ALK
Cisplatin-AQ	cis-Diammineplatinum(II) dichloride, Platinol, CIS-DDP	Cytotoxic	DNA
Cobimetinib	RG7421; GDC-0973; XL518	Targeted	MAP2K (MEK)
CPI-203	CPI203; CPI-203; CPI 203; TEN010; TEN 010; TEN010; JQ-2; JQ 2; JQ2; RG-6146; RG 6146	Targeted	BRD4
CPI-455	CPI455; CPI 455	Targeted	pan-KDM5
Crenigacestat	LY-3039478; LY 3039478	Targeted	PSEN1/PSENEN/NCSTN/APH1A | NOTCH1
Crenolanib	NA	Targeted	FLT3 (CD135); PDGFR
Crizotinib	PF-02341066; PF02341066; PF 02341066; Xalkori	Targeted	EML4-ALK | MET | ROS1
CYC065	Fadraciclib	Targeted	CDK2; CDK9
Cytarabine	Cytosine-D-arabinofuranoside; cytosine arabinoside; Ara-C; ara-cytidine, arabinosyl cytosine, U-19920	Cytotoxic	DNA polymerase
Dabrafenib	GSK2118436	Targeted	BRAF
Dacarbazine	Imidazole carboxamide; DTIC	Cytotoxic	DNA
Dasatinib	BMS-354825	Targeted	BCR-AB | SRC; FYN; LCK; YES1 | EPHA2 | PDGFRB; KIT (CD117)
Daunorubicin	Daunomycin hydrochloride	Cytotoxic	TOP2
Decitabine	Deoxycytidine; Dacogen	Cytotoxic	DNMT
Defactinib	VS-6063; VS6063; VS 6063; PF04554878; PF-04554878; PF 04554878	Targeted	PTK2B
Dexamethasone	DHAP	Cytotoxic	NR3C1 (GR)
Dimethyl doxorubicin	NA	Cytotoxic	TOP2
Docetaxel	NA	Cytotoxic	TUBB
Dovitinib	TKI-258; TKI 258; CHIR-258; GFKI-258; Growth factor kinase inhibitor 258	Targeted	FGFR3 | PDGFRB; KIT (CD117); FLT3 (CD135) | VEGFR1 (FLT1); VEGFR2 (KDR); VEGFR3 (FLT4)
Doxorubicin	Adriamycin; adriacin; adriblastina; adriblastin	Cytotoxic	TOP2
EHT 1864	EHT1864; EHT-1864	Targeted	Rac1; Rac1b; Rac2; Rac3
Enasidenib	AG-221; Idhifa	Targeted	IDH2
Ensartinib	X-396; X 396; X396	Targeted	ALK (CD246)
Entinostat	MS-275; SNDX-275	Targeted	HDAC1; HDAC2; HDAC3; HDAC4; HDAC5; HDAC6; HDAC7; HDAC8; HDAC9; HDAC10; HDAC11
Entospletinib	GS-9973; GS9973; GS 9973	Targeted	SYK
Entrectinib	RXDX-101	Targeted	ALK (CD246) | ROS1 | NTRK1 (TRKA); NTRK2 (TRKB); NTRK3 (TRKC)
Epidaza	Chidamide; CS055; HBI-800	Targeted	HDAC1; HDAC2; HDAC3; HDAC10
Eprenetapopt	PRIMA-1MET; APR-246	Targeted	TP53 | TXNRD1
Erdafitinib	JNJ-42756493	Targeted	FGFR2; FGFR3
Erlotinib	CP-358774; CP358774; OSI-774; NSC 718781; RG-1415; Ro-508231; R-1415; Tarceva	Targeted	EGFR
Etoposide	VP-16, VP-16213; etopophos; vepesid; eposin	Cytotoxic	TOP2
Everolimus	RAD001	Targeted	MTOR
Fenretinide	NA	Cytotoxic	NR1B (RAR)
Fimepinostat	Fimepinostat	Targeted	HDAC1; HDAC2; HDAC3; HDAC4; HDAC5; HDAC6; HDAC7; HDAC8; HDAC9; HDAC10 | PIK3C3 (VPS34)
Futibatinib	NA	Targeted	FGFR2
FX1	NA	Targeted	BCL6
Galunisertib	LY2157299	Targeted	TGFBR1
Ganetespib	STA-9090	Targeted	HSP90
Gemcitabine	Gemzar; LY-188011	Cytotoxic	RRM1
Glasdegib	PF-04449913	Targeted	SMO
GSK J4	NA	Targeted	KDM6A; KDM6B
GSK1070916	GSK-1070916; GSK-1070916A	Targeted	AURKB; AURKC
GSK2636771	NA	Targeted	PIK3β
GSK269962A	GSK 269962A; GSK-269962A; GSK269962; GSK 269962; GSK-269962	Targeted	ROCK1; ROCK2
GSK461364	GSK461364A; GSK 461364; GSK-461364	Targeted	PLK1
I-BRD9	NA	Targeted	BRD9
Ibrutinib	CRA-032765; IMBRUVICA; Imbruvica; ImBurvica; JNJ-54179060; PCI-32765	Targeted	BTK
Icotinib	BPI-2009H; Conmana	Targeted	EGFR
Idasanutlin	RG7388	Targeted	MDM2
Idelalisib	CAL-101; GS-1101	Targeted	PI3Kδ
Imatinib	STI571; STI-571; ST1571 mesylate; CGP-57148B; Gleevec	Targeted	BCR-ABL | FIP1L1-PDGFRA; KIT (CD117)
Ipatasertib	GDC-0068; RG7440	Targeted	AKT (PKB)
Iphosphamide	NA	Cytotoxic	DNA
IPI549	IPI-549; IPI 549	Targeted	PIK3γ
Isotretinoin	13-cis-Retinoic acid	Cytotoxic	NR1B (RAR)
Ixazomib	MLN2238	Targeted	PSMB5
JQ-1 carboxylic acid	NA	Targeted	BRD4
Karonudib	TH1579	Targeted	MTH1
KU-55933	KU55933; KU 55933	Targeted	ATM
KU-60019	KU60019; KU 60019	Targeted	ATM
Lapatinib	Tyverb; GW-572016, GSK572016; Tykerb	Targeted	EGFR; ERBB2 (HER2, CD340)
Larotrectinib	LOXO-101; ARRY-470	Targeted	NTRK1 (TRKA); NTRK2 (TRKB); NTRK3 (TRKC)
Lenvatinib	E7080	Targeted	FGFR1; FGFR2; FGFR3; FGFR4 | RET | VEGFR1 (FLT1); VEGFR2 (KDR); VEGFR3 (FLT4)
LGK974	LGK 974; LGK-974; WNT 974	Targeted	PORCN
Linsitinib	ASP-7487; OSI-906; OSI-906AA	Targeted	IGF1R (CD221)
LMK-235	LMK 235; LMK235	Targeted	HDAC4; HDAC5
Lorlatinib	PF-06463922	Targeted	ALK (CD246); EML4-ALK | ROS1
LTURM34	LTURM 34; LTURM-34	Targeted	DNA-PK
Masitinib	AB1010; AB-1010; AB 1010; Masivet	Targeted	KIT (CD117)
Melphalan	NA	Cytotoxic	DNA
Merestinib	LY2801653; LY-2801653	Targeted	AXL | MET; RON | MKNK
Metformin	Metformine	Targeted	AMPK (PRKAA)
Methotrexate	Abitrexate, Amethopterin, Rheumatrex, Trexall, Folex	Cytotoxic	DHFR
Midostaurin	CGP41231; PKC412; CGP 41251	Targeted	PDGFR; KIT (CD117); FLT3 (CD135) | VEGFR2 (KDR) | PRKCA; PRKCB; PRKCG
Milademetan	DS-3032b; DS-3032	Targeted	MDM2
Miransertib	ARQ 092; ARQ-092: ARQ092	Targeted	AKT (PKB)
Mitoxantrone	Mitozantrone dihydrochloride	Cytotoxic	TOP2
MK-2206	MK 2206 dihydrochloride; MK2206 dihydrochloride	Targeted	AKT (PKB)
MM102	HMTase Inhibitor IX; MM-102	Targeted	MLL1
Molibresib	I-BET-762; GSK525762; GSK525762A	Targeted	BRD4
Momelotinib	CYT387	Targeted	JAK1; JAK2
MTIC	NSC 407347; 3-methyl-(triazen-1-yl)imidazole-4-carboxamide	Cytotoxic	DNA
Mubritinib	TAK165; TAK-165; TAK 165	Targeted	ERBB2 (HER2, CD340)
MX69	MX 69; MX-69	Targeted	MDM2/XIAP
Navitoclax	ABT-263; ABT263; ABT 263	Targeted	BCL2L
Nedisertib	Nedisertib; M 3814; M3814; MSC-2490484A; MSC 2490484A; MSC2490484A	Targeted	DNA-PK
Neratinib	HKI-272; HKI272; HKI 272; Nerlynx	Targeted	EGFR; ERBB2 (HER2, CD340); ERBB4 (HER4)
Nilotinib	AMN-107; AMN 107; Tasigna	Targeted	BCR-ABL | PDGFR; KIT (CD117)
Niraparib	MK-4827; MK 4827; MK4827; Zejula	Targeted	PARP1; PARP2
Olaparib	AZD2281; Ku-0059436; lynparza	Targeted	PARP1; PARP2
Osimertinib	AZD-9291; Tagrisso	Targeted	EGFR
Oxaliplatin	NA	Cytotoxic	DNA
Paclitaxel	Taxol; NSC 125973; BMS-181339-01; Onxol; Paxene; Praxel; Abraxane	Cytotoxic	TUBB
Palbociclib	PD0332991; PD-0332991; PF-00080665-73	Targeted	CDK4; CDK6
Pamiparib	BeiGene-290; BGB-290; BGB-290-BeiGene; PARPi - BeiGene	Targeted	PARP1; PARP2; PARP3
Panobinostat	LBH589	Targeted	HDAC1; HDAC2; HDAC3; HDAC4; HDAC5; HDAC6; HDAC7; HDAC8; HDAC9; HDAC10; HDAC11
Pazopanib	GW-786034; GW786034; Votrient	Targeted	PDGFR; KIT (CD117) | VEGFR1 (FLT1); VEGFR2 (KDR); VEGFR3 (FLT4)
PCI-34051	NA	Targeted	HDAC8
PD-0325901	PD0325901, PD 0325901	Targeted	MAP2K (MEK)
Perifosine	KRX-0401; NSC 639966; D21266	Targeted	AKT (PKB); PRKCA | ERK
Pevonedistat	Pevonedistat; MLN4924; MLN-4924	Targeted	NAE1
PF-06651600	NA	Targeted	JAK3
Pictilisib	GDC-0941; GDC0941; RG-7621	Targeted	PI3Kα; PI3Kβ; PI3Kδ
Pinometostat	EPZ-5676; EPZ5676; EPZ 5676	Targeted	DOT1L
Ponatinib	AP24534, AP-24534, KIN001-192, Iclusig	Targeted	BCR-ABL
Prednisolone	NA	Cytotoxic	NR3C1 (GR)
Prexasertib	LY2606368	Targeted	CHEK1
Quizartinib	AC220; AC 220; AC-220; Asp-2689	Targeted	FLT3 (CD135)
Ravoxertinib	RG7842; RG-7842; RG 7842; GDC0994; GDC-0994; GDC 0994	Targeted	ERK
Regorafenib	BAY 73-4506	Targeted	FGFR1 | PDGFRB; KIT (CD117) | RET | TEK (TIE2, CD202) | VEGFR1 (FLT1); VEGFR2 (KDR); VEGFR3 (FLT4) | BRAF; RAF1
Ribociclib	LEE011; LEE-011; LEE 011	Targeted	CDK4; CDK6
Romidepsin	Istodax; FK 228; FR 901228; NSC 630176; NSC 630176D; depsipeptide; RMD	Targeted	HDAC1; HDAC2; HDAC3; HDAC4; HDAC5; HDAC6; HDAC7; HDAC8; HDAC9; HDAC10; HDAC11
Rucaparib	AG-014699; AG-14699; CO-338; PF-01367338; PF-1367338; Rubraca; Rucaparib phosphate	Targeted	PARP1; PARP2; PARP3
Ruxolitinib	INCB018424; INCB-18424; Jakafi	Targeted	JAK1; JAK2
S63845	S-63845; S 63845	Targeted	MCL1
Samotolisib	LY-3023414; LY 3023414; samotolisib; LY3023414	Targeted	MTOR | PI3Kα; PI3Kβ; PI3Kδ
Sapitinib	AZD8931	Targeted	EGFR; ERBB2 (HER2, CD340); ERBB3 (HER3)
SAR405	SAR-405; SAR 405	Targeted	PIK3C3 (VPS34)
Saracatinib	AZD0530; AZD-0530; AZ-10353926	Targeted	ABL1 | SRC
Savolitinib	Volitinib; HMPL-504; AZD-6094; AZD6094	Targeted	MET
Selinexor	KPT-330	Targeted	XPO1
Selumetinib	AZD6244; AZD-6244; ARRY-886	Targeted	MAP2K (MEK)
Sepantronium bromide	Sepantronium bromide; YM-155; YM 155; YM155	Targeted	BIRC5
SHP099	SHP 099; SHP-099	Targeted	SHP2
Siremadlin	Siremadlin; NVP-HDM201	Targeted	MDM2
Sirolimus	Rapamycin; AY 22989; AY-22989; SILA 9268A; WY-090217; Torisel; Rapamune	Targeted	MTOR
Sitravatinib	MGCD516; MG516	Targeted	AXL | EPHA1; EPHA2; EPHB1; EPHB2; EPHB4 | MET | PDGFR | VEGFR1 (FLT1); VEGFR2 (KDR); VEGFR3 (FLT4)
SN-38	(S)-(+)-Camptothecin; CPT; 7-Ethyl-10-Hydroxy-Camptothecin; Camptothecin, Irinotecan; Camptothecin-11; Camptosar	Cytotoxic	TOP1
Sonidegib	Erismodegib; LDE225; NVP-LDE225	Targeted	SMO
Sorafenib	BAY 43-9006; Nexavar; 284461-73-0	Targeted	PDGFRB; KIT (CD117); FLT3 (CD135) | RET | VEGFR2 (KDR); VEGFR3 (FLT4) | BRAF; RAF1
Sunitinib	SU 11248; SU-11248; Sutent	Targeted	CSF1 | PDGFR; KIT (CD117); FLT3 (CD135) | RET | VEGFR1 (FLT1); VEGFR2 (KDR); VEGFR3 (FLT4)
Talazoparib	BMN 673; BMN-673; LT-673	Targeted	PARP1; PARP2
Tanespimycin	17-AAG; CP127374,NSC-330507, KOS 953; BMS-722782	Targeted	HSP90
Taselisib	RG7604; GDC 0032; GDC-0032	Targeted	PI3Kα; PI3Kβ; PI3Kδ
Tazemetostat	EPZ-6438; EPZ6438; EPZ 6438; E-7438; 1403254-99-8; UNII-Q40W93WPE1	Targeted	EZH2
Temozolomide	NA	Cytotoxic	DNA
Temsirolimus	CCI-779; Torisel	Targeted	MTOR
ThioTEPA	Thio-TEPA; thioplex; tiofosfamid	Cytotoxic	DNA
THZ1	CDK7 inhibitor	Targeted	CDK7
THZ531	NA	Targeted	CDK12; CDK13
Tivantinib	ARQ 197	Targeted	MET
Topotecan	K&F 104864-A; SKF 104864A; SKFS 104864A; NSC 609669; nogitecan hydrochloride	Cytotoxic	TOP1
Trametinib	GSK-1120212; GSK1120212; JTP-74057; Mekinist	Targeted	MAP2K (MEK)
Vactosertib	EW7197; EW 7197; Vactosertib; NOV 1301; TEW-7197	Targeted	ALK (CD246)
Vandetanib	ZD6474; ZD-6474; ZD 6474	Targeted	EGFR | RET | VEGFR2 (KDR)
Varlitinib	ARRY334543	Targeted	EGFR; ERBB2 (HER2, CD340); ERBB4 (HER4)
Vemurafenib	RG7204; R7204; RO5185426; PLX4032	Targeted	BRAF
Venetoclax	ABT199; ABT-199; GDC-0199	Targeted	BCL2
Vinblastine	Velban	Cytotoxic	TUBB
Vincristine	Leurocristine sulfate; 22-oxovincaleukoblastine sulfate	Cytotoxic	TUBB
Vindesine	Eldisine	Cytotoxic	TUBB
Vismodegib	GDC-0449; Erivedge	Targeted	SMO
Vistusertib	AZD2014; AZD-2014	Targeted	MTOR
Volasertib	BI6727; BI 6727; BI-6727	Targeted	PLK1
Vorinostat	SAHA; MK0683	Targeted	HDAC1; HDAC2; HDAC3; HDAC4; HDAC5; HDAC6; HDAC7; HDAC8; HDAC9; HDAC10; HDAC11
XAV-939	NVP-XAV939; XAV939; XAV 939	Targeted	TNKS1; TNKS2
YO-01027	Dibenzazepine; DBZ	Targeted	PSEN1/PSENEN/NCSTN/APH1A

## Sheet: Table_3
Supplementary Table 3| Ongoing clinical trials in neuroblastoma (data retrieved from clinicaltrials.gov, December 2021)
Target	Compound	Clinical Trial Number	Study Name
ALK	Ceritinib	NCT01742286	Phase I Study of LDK378 in Pediatric, Malignancies With a Genetic Alteration in Anaplastic Lymphoma Kinase (ALK)
ALK	Ceritinib	NCT02559778	Pediatric Precision Laboratory Advanced Neuroblastoma Therapy
ALK	Crizotinib	NCT01121588	An Investigational Drug, Crizotinib (PF-02341066), Is Being Studied In Tumors, Except Non-Small Cell Lung Cancer, That Are Positive For Anaplastic Lymphoma Kinase (ALK)
ALK	Crizotinib	NCT01606878	Crizotinib and Combination Chemotherapy in Treating Younger Patients With Relapsed or Refractory Solid Tumors or Anaplastic Large Cell Lymphoma
ALK	Crizotinib	NCT00939770	Crizotinib in Treating Younger Patients With Relapsed or Refractory Solid Tumors or Anaplastic Large Cell Lymphoma
ALK	Ensartinib	NCT03213652	Ensartinib in Treating Patients With Relapsed or Refractory Advanced Solid Tumors, Non-Hodgkin Lymphoma, or Histiocytic Disorders With ALK or ROS1 Genomic Alterations (A Pediatric MATCH Treatment Trial)
ALK	Entrectinib	NCT02650401	Study Of Entrectinib (Rxdx-101) in Children and Adolescents With Locally Advanced Or Metastatic Solid Or Primary CNS Tumors And/Or Who Have No Satisfactory Treatment Options
ALK	Lorlatinib	NCT04753658	Real World Data Collection Pediatric Neuroblastoma Treated With Lorlatinib
ALK	Lorlatinib	NCT03107988	NANT 2015-02: A Phase 1 Study of Lorlatinib (PF-06463922)
AURKA	Alisertib	NCT01154816	Alisertib in Treating Young Patients With Recurrent or Refractory Solid Tumors or Leukemia
AURKA	LY3295668	NCT04106219	A Study of LY3295668 Erbumine in Participants With Relapsed/Refractory Neuroblastoma
AURKA	MLN8237	NCT02444884	MLN8237 to Treat Children With Relapsed/Refractory Solid Tumors
AURKA	MLN8237	NCT01601535	Study of MLN8237 in Combination With Irinotecan and Temozolomide
BCR-ABL	Dasatinib	NCT01467986	Multimodal Molecular Targeted Therapy to Treat Relapsed or Refractory High-risk Neuroblastoma
BCR-ABL	Imatinib	NCT00030667	Imatinib Mesylate in Treating Patients With Relapsed or Refractory Solid Tumors of Childhood
BET	BMS-986158	NCT03936465	Study of the Bromodomain (BRD) and Extra-Terminal Domain (BET) Inhibitor BMS-986158 in Pediatric Cancer
BET	GSK525762	NCT01587703	A Study to Investigate the Safety, Pharmacokinetics, Pharmacodynamics, and Clinical Activity of GSK525762 in Subjects With NUT Midline Carcinoma (NMC) and Other Cancers
BRAF	Dabrafenib	NCT03975829	Pediatric Long-Term Follow-up and Rollover Study
CDK4/6	Abemaciclib	NCT02644460	Abemaciclib in Children With DIPG or Recurrent/Refractory Solid Tumors
CDK4/6	Abemaciclib	NCT04238819	A Study of Abemaciclib (LY2835219) in Combination With Temozolomide and Irinotecan and Abemaciclib in Combination With Temozolomide in Children and Young Adult Participants With Solid Tumors
CHK1	Prexasertib	NCT02808650	Prexasertib in Treating Pediatric Patients With Recurrent or Refractory Solid Tumors
EGFR	Erlotinib	NCT00101348	Erlotinib and Cetuximab With or Without Bevacizumab in Treating Patients With Metastatic or Unresectable Kidney, Colorectal, Head and Neck, Pancreatic, or Non-Small Cell Lung Cancer
EGFR	Erlotinib	NCT00077454	Erlotinib and Temozolomide in Treating Young Patients With Recurrent or Refractory Solid Tumors
EGFR	Erlotinib	NCT00030498	Erlotinib in Treating Patients With Solid Tumors and Liver or Kidney Dysfunction
EGFR	Gefitinib	NCT00068497	Gefitinib in Treating Patients With Metastatic or Unresectable Head and Neck Cancer or Non-Small Cell Lung Cancer
EGFR	Gefitinib	NCT00135135	Therapy for Children With Neuroblastoma
FGFR	Erdafitinib	NCT03210714	Erdafitinib in Treating Patients With Relapsed or Refractory Advanced Solid Tumors, Non-Hodgkin Lymphoma, or Histiocytic Disorders With FGFR Mutations (A Pediatric MATCH Treatment Trial)
FGFR	Regorafenib	NCT02085148	A Phase I Dose Finding Study in Children With Solid Tumors Recurrent or Refractory to Standard Therapy
HDAC	CUDC-907	NCT02909777	Trial of CUDC-907 in Children and Young Adults With Relapsed or Refractory Solid Tumors, CNS Tumors, or Lymphoma
HDAC	Panobinostat	NCT04897880	A Study of Panobinostat in Pediatric Patients With Solid Tumors Including MRT/ATRT
HDAC	Vorinostat	NCT04308330	Vorinostat in Combination With Chemotherapy in Relapsed/Refractory Solid Tumors and CNS Malignancies
HDAC	Vorinostat	NCT01132911	A Phase I Study of Vorinostat and Bortezomib in Children With Refractory of Recurrent Solid Tumors, Including CNS Tumors and Lymphomas
HDAC	Vorinostat	NCT00217412	Vorinostat With or Without Isotretinoin in Treating Young Patients With Recurrent or Refractory Solid Tumors, Lymphoma, or Leukemia
HDAC	Vorinostat	NCT01019850	N2007-03: Vorinostat and 131-I MIBG in Treating Patients With Resistant or Relapsed Neuroblastoma
HSP90	Tanespimycin	NCT00093821	Tanespimycin in Treating Young Patients With Recurrent or Refractory Leukemia or Solid Tumors
MDM2	Idasanutlin	NCT04029688	A Study Evaluating the Safety, Tolerability, Pharmacokinetics, and Preliminary Activity of Idasanutlin in Combination With Either Chemotherapy or Venetoclax in the Treatment of Pediatric and Young Adult Participants With Relapsed/Refractory Acute Leukemias or Solid Tumors
MDM2	LEE011	NCT01747876	Study of Safety and Efficacy in Patients With Malignant Rhabdoid Tumors (MRT) and Neuroblastoma
MDM2	Palbociclib	NCT03709680	Study Of Palbociclib Combined With Chemotherapy In Pediatric Patients With Recurrent/Refractory Solid Tumors
MEK	Trametinib	NCT03979651	MEK and Autophagy Inhibition in Metastatic/Locally Advanced, Unresectable Neuroblastoma RAS (NRAS) Melanoma
MEK	Trametinib	NCT02124772	Study to Investigate Safety, Pharmacokinetic (PK), Pharmacodynamic (PD) and Clinical Activity of Trametinib in Subjects With Cancer or Plexiform Neurofibromas and Trametinib in Combination With Dabrafenib in Subjects With Cancers Harboring V600 Mutations
mTOR	SF1126	NCT02337309	SF1126 for Patients With Relapsed or Refractory Neuroblastoma
mTOR	Sirolimus	NCT01331135	Aflac ST0901 CHOANOME - Sirolimus in Solid Tumors
mTOR	Sirolimus	NCT02574728	Sirolimus in Combination With Metronomic Chemotherapy in Children With Recurrent and/or Refractory Solid and CNS Tumors
PARP	Niraparib	NCT04544995	Dose Escalation and Cohort Expansion Study of Niraparib and Dostarlimab in Pediatric Participants With Solid Tumors
PARP	Olaparib	NCT03233204	Olaparib in Treating Patients With Relapsed or Refractory Advanced Solid Tumors, Non-Hodgkin Lymphoma, or Histiocytic Disorders With Defects in DNA Damage Repair Genes (A Pediatric MATCH Treatment Trial)
PDGFR	Pazopanib	NCT01130623	A Phase I Study of Pazopanib as a Single Agent for Children With Refractory Solid Tumors
PDGFR	Sorafenib	NCT02298348	Sorafenib and Cyclophosphamide/Topotecan in Patients With Relapsed and Refractory Neuroblastoma
PDGFR	Sorafenib	NCT01518413	Dose Escalation Study of Sorafenib and Irinotecan Combination Therapy in Pediatric Patients With Solid Tumors
SMO	LDE225	NCT01125800	A Phase I Dose Finding and Safety Study of Oral LDE225 in Children and a Phase II Portion to Assess Preliminary Efficacy in Recurrent or Refractory MB
VEGFR	Anlotinib	NCT04842526	Efficacy and Safety of Anlotinib, Irinotecan and Temozolomide in the Treatment of Refractory or Recurrent Neuroblastoma in Children: an Open, Single Arm, Single Center, Phase II Clinical Study
VEGFR	Apatinib	NCT05027386	Apatinib Mesylate Combined With IT Regimen for the Treatment of Recurrent or Refractory Pediatric Neuroblastoma
VEGFR	ZD6474	NCT00533169	ZD6474 Alone and in Combination With Retinoic Acid in Pediatric Neuroblastoma
WEE1	Adavosertib	NCT02095132	Adavosertib and Irinotecan Hydrochloride in Treating Younger Patients With Relapsed or Refractory Solid Tumors

## Sheet: Table_4
Supplementary Table 4| IC50 values of classical cell lines following 72-hour prexasertib treatment
Cell Line	Aberrations	IC50 (nM)
IMR32	11q del, MYCN amp	0.758368
NGP		2.78256
SJNB6		5.11339
SKNAS	11q del, MYCN wt	1.73876
CHLA-90		3.37698
Gimen		4.57784
SJNB8	11q wt, MYCN amp	4.70622
SKNBE		4.45296
KCNR		4.57784
SH-SY5Y	11q wt, MYCN wt	141.303
SJNB12		107.159
Shep2		123.052

## Sheet: Table_5
Supplementary Table 5| List of compounds that combine synergistically with prexasertib and calculated bliss independence synergy score and percent viability following 72-hour combination treatment.
Compound	Bliss score	Viability (%)
AMG 337	0.2	81.7
4-Hydroperoxy cyclophosphamide	0.25	77.8
Aclarubicin	0.23	31.7
Adavosertib	0.47	12.7
AMG-176	0.21	22.2
Berzosertib	0.79	83.5
Birinapant	0.49	30.5
Carboplatin	0.28	38.3
cisplatin-AQ	0.28	38.7
CPI-455	0.23	77.3
Cytarabine	0.3	15.8
Dasatinib	0.24	24.4
Enasidenib	0.23	66.8
Gemcitabine	0.28	42
Glasdegib	0.23	73.8
KU-55933	0.23	65.5
Lapatinib	0.47	69.5
Merestinib	0.85	80.3
Metformin	0.2	79
Midostaurin	0.24	75.3
Midostaurin	0.26	86.9
Molibresib	0.26	71.9
oxaliplatin	0.24	38.1
Savolitinib	0.21	61.5
Sepantronium bromide	0.24	50.6
SN-38 (Irinotecan)	0.24	15.7
Temsirolimus	0.28	41.8
ThioTEPA	0.2	45.4
Topotecan	0.2	10.2
